# Supplementary material for: Persistently low CD4 cell counts are associated with hepatic events in HCV/HIV coinfected patients: data from the national free antiretroviral treatment program of China
Source: PubMed Central journal article supplement — Chin Med J (Engl). 2022 Dec 27;135(22):2699–705. doi: 10.1097/CM9.0000000000002502 (PMC9943990; doi:10.1097/cm9.0000000000002502), 2022-12-27
Supplement: cm9-135-2699-s001.pdf [file cm9-135-2699-s001.pdf]

**Supplementary Table 1: Anti-HCV treatment of studied patients.**

| <b>Items</b>                     | <b>Total patients (<i>N</i> = 793)</b> |
|----------------------------------|----------------------------------------|
| Anti-HCV treatment, <i>n</i> (%) | 386 (48.7)                             |
| Interferon                       | 91/386 (23.6)                          |
| DAAs                             | 247/386 (64.0)                         |
| Interferon switch to DAAs*       | 48/386 (12.4)                          |
| SVR rates, <i>n</i> (%)          |                                        |
| Overall                          | 347/358 (96.9)                         |
| Interferon based                 | 75/130 (57.7)                          |
| DAAs based                       | 272/275 (98.9)                         |

\*Patients switched from interferon to DAAs because no SVR after interferon treatment. SVR was defined as undetectable HCV RNA  $\geq 12$  weeks after completion of treatment. DAAs: Direct-acting antiviral drugs; HCV: Hepatitis C virus; RNA: Ribonucleic acid; SVR: Sustained virologic response.

**Supplementary Table 2: Characteristics of patients with and without hepatic events.**

| Characteristics           | Without hepatic events ( <i>n</i> = 750) | With hepatic events ( <i>n</i> = 43) | <i>P</i> -value |
|---------------------------|------------------------------------------|--------------------------------------|-----------------|
| Age at enrollment (years) | 38.0 (33.0–44.0)                         | 42.0 (37.0–46.0)                     | 0.017           |
| Male                      | 601 (80.1)                               | 39 (90.7)                            | 0.088           |
| BMI (kg/m <sup>2</sup> )  | 20.0 (18.4–21.9)                         | 20.0 (18.0–21.6)                     | 0.943           |
| HIV transmission          | 750                                      | 43                                   | 0.173           |
| IDU                       | 464 (61.9)                               | 30 (69.8)                            |                 |
| Sexual                    | 232 (30.9)                               | 13 (30.2)                            |                 |
| Other*                    | 54 (7.2)                                 | 0 (0.0)                              |                 |
| CD4 count (/μL)           | 118.0 (31.3–2237.5)                      | 146.0 (47.0–227.0)                   | 0.692           |
| CD4 count categories      | 740                                      | 41                                   | 0.663           |
| <200                      | 495 (66.9)                               | 28 (68.3)                            |                 |

|                                        |                     |                     |        |
|----------------------------------------|---------------------|---------------------|--------|
| 200–350                                | 178 (24.1)          | 12 (29.3)           |        |
| 351–500                                | 48 (6.5)            | 1 (2.4)             |        |
| >500                                   | 19 (2.6)            | 0 (0.0)             |        |
| CD4/CD8 ratio                          | 0.158 (0.056–0.289) | 0.156 (0.091–0.299) | 0.511  |
| HIV RNA (log <sub>10</sub> copies/mL)* | 4.7 (3.9–5.2)       | 4.9 (3.6–5.2)       | 0.713  |
| Initial antiretroviral regimen         | 750                 | 43                  | <0.001 |
| NRTIs + NNRTIs                         | 616 (82.1)          | 25 (58.1)           |        |
| NRTIs + PIs                            | 85 (11.3)           | 8 (18.6)            |        |
| Other regimens/unknown                 | 49 (6.5)            | 10 (23.3)           |        |
| Liver cirrhosis                        | 160 (21.3)          | 28 (65.1)           | <0.001 |
| Platelet (×10 <sup>9</sup> /L)         | 164.0 (117.0–209.0) | 91.0 (57.0–187.0)   | <0.001 |
| Hemoglobin (g/L)                       | 124.0 (106.0–140.0) | 122.5 (103.8–129.0) | 0.012  |

|                                   |                  |                  |        |
|-----------------------------------|------------------|------------------|--------|
| ALT (U/L)                         | 37.0 (26.0–55.0) | 56.0 (31.0–82.0) | 0.023  |
| Albumin (g/L)                     | 38.0 (31.0–42.0) | 30.0 (24.0–35.0) | <0.001 |
| Total bilirubin (μmol/L)          | 9.0 (6.7–12.3)   | 11.7 (7.1–18.8)  | <0.001 |
| HBsAg positive                    | 117/729 (16.0)   | 13/41 (31.7)     | 0.009  |
| HCV RNA (log <sub>10</sub> IU/mL) | 6.0 (3.7–6.8)    | 5.8 (4.7–6.6)    | 0.894  |
| Undetectable HCV RNA              | 133 (17.7)       | 8 (18.6)         | 0.884  |
| HCV genotype                      | 232              | 12               | 0.369  |
| 1                                 | 40 (17.2)        | 0 (0.0)          |        |
| 2                                 | 6 (2.6)          | 0 (0.0)          |        |
| 3                                 | 65 (28.0)        | 3 (25.0)         |        |
| 6                                 | 121 (52.2)       | 9 (75.0)         |        |

---

Data are presented as *n*, *n/N* (%), *n* (%) or median (interquartile range). \*Data were available at 157 patients.

ALT: Alanine aminotransferase; HBsAg: Hepatitis B surface antigen; HBV: Hepatitis B virus; HCV: Hepatitis C virus; HIV: Human

immunodeficiency virus; IDU: Intravenous drug-using; IQR: Interquartile range; NNRTIs: Non-nucleoside reverse transcriptase inhibitors; NRTIs: Nucleoside reverse transcriptase inhibitors; PIs: Protease inhibitors; RNA: Ribonucleic acid.

**Supplementary Table 3: Sensitivity analyses of the association between peak CD4 cell count <200/ $\mu$ L and hepatic events.**

| Items             | Subgroups           | Patients | Hepatic events | Peak CD4 cell count <200/ $\mu$ L |
|-------------------|---------------------|----------|----------------|-----------------------------------|
|                   |                     |          |                | aOR (95% CI)                      |
| Age at enrollment | <40 years           | 453      | 18             | 12.75 (2.09–77.91)                |
|                   | $\geq$ 40 years     | 358      | 25             | 2.54 (0.51–12.90)                 |
| Baseline CD4      | <200/ $\mu$ L       | 523      | 28             | 2.68 (0.77–9.40)                  |
|                   | $\geq$ 200/ $\mu$ L | 258      | 13             | 169.54 (4.82–5968.65)             |
| Cirrhosis         | Yes                 | 188      | 28             | 6.38 (1.06–38.56)                 |
|                   | No                  | 605      | 15             | 6.44 (1.28–32.46)                 |

|                    |     |     |    |                   |
|--------------------|-----|-----|----|-------------------|
| Anti-HCV treatment | Yes | 386 | 9  | 0.75 (0.04–14.60) |
|                    | No  | 407 | 34 | 5.93 (1.67–21.07) |

---

Multivariate logits regression models were used, patients with peak CD4 >500/ $\mu$ L as the reference group. Age at enrollment, gender (male and female), baseline CD4 cell count, initial antiretroviral regimen (NRTIs plus NNRTIs, NRTIs plus PIs, other regimens/unknown), liver cirrhosis (with and without), platelet, hemoglobin, ALT, albumin, total bilirubin, HBsAg status (positive and negative), HCV RNA, and anti-HCV treatment (with and without) were adjusted, as appropriate.

ALT: Alanine aminotransferase; aOR: Adjusted odds ratio; CI: Confidence interval; HBsAg: Hepatitis B surface antigen; HCV: Hepatitis C virus; RNA: Ribonucleic acid.

**Supplementary Table 4: Association between peak CD4 cell count and clinical outcomes.**

| Items        | Peak CD4 cell count < 200/ $\mu$ L |                   |                         |                     |
|--------------|------------------------------------|-------------------|-------------------------|---------------------|
|              | Cirrhosis decompensation           | HCC               | Liver-related mortality | All-cause mortality |
|              | aOR (95% CI)                       | aOR (95% CI)      | aOR (95% CI)            | aOR (95% CI)        |
| Univariate   | 10.28 (4.16–25.43)                 | 4.05 (0.99–16.65) | 21.18 (4.01–111.79)     | 25.33 (11.71–54.80) |
| Multivariate | 4.20 (1.47–11.94)                  | 2.42 (0.37–15.84) | 19.36 (3.11–120.48)     | 14.62 (6.22–34.32)  |

Multivariate logits regression models were used, patients with peak CD4 >500/ $\mu$ L as the reference group. Age at enrollment, gender (male and female), baseline CD4 cell count, initial antiretroviral regimen (NRTIs plus NNRTIs, NRTIs plus PIs, other regimens/unknown), liver cirrhosis (with and without), platelet, hemoglobin, ALT, albumin, total bilirubin, HBsAg status (positive and negative), HCV RNA, and anti-HCV treatment (with and without) were adjusted, as appropriate.

ALT: Alanine aminotransferase; aOR: Adjusted odds ratio; CI: Confidence interval; HBsAg: Hepatitis B surface antigen; HCC: Hepatocellular carcinoma; HCV: Hepatitis C virus; RNA: Ribonucleic acid.
